# Supplementary material
Source: PubMed Central journal article supplement (PMC5716853)

# Legend for Figure 1 Map

## Features

State or Territory Small-Scale

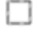

## National Land Cover Database (NLCD)

NLCD\_2011

Canopy\_2011\_CONUS

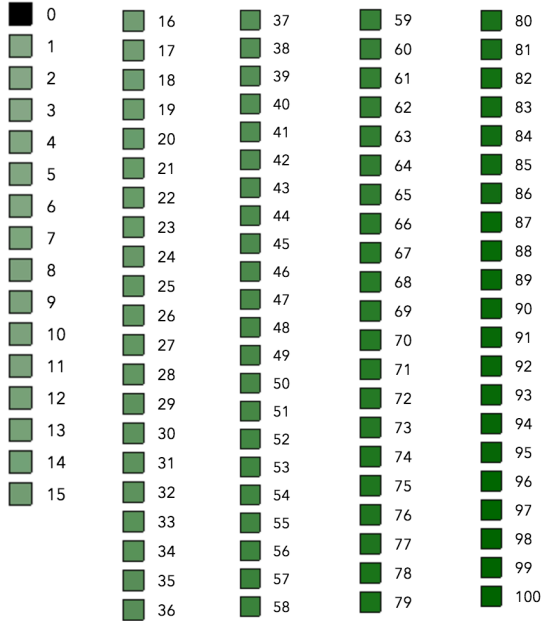

NLCD\_2006

Land\_Cover\_2006\_CONUS

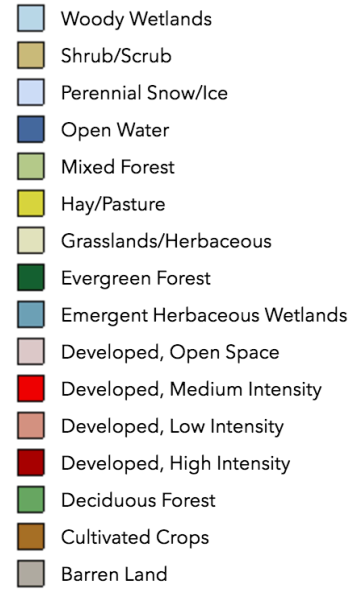

Supplement: NIHMS910744-supplement-Supp_FigS1.pdf [file NIHMS910744-supplement-Supp_FigS1.pdf]
